ing solution, wherein only colloid concentration has changed, is what then enters the brain.

Again thanks to all for the beautiful demonstration of the relevance of physical chemistry to physiology!

**Elana B. Lubit, M.D., Ph.D.**, New York University School of Medicine, New York, New York. [elana.lubit@nyumc.org](mailto:elana.lubit@nyumc.org)

## References

1. Jungner M, Grände PO, Mattiasson G, Bentzer P: Effects on brain edema of crystalloid and albumin fluid resuscitation after brain trauma and hemorrhage in the rat. *ANESTHESIOLOGY* 2010; 112:1194-203
2. Drummond JC: Colloid osmotic pressure and the formation of posttraumatic cerebral edema. *ANESTHESIOLOGY* 2010; 112: 1079-81

*(Accepted for publication August 10, 2010.)*

## *In Reply:*

I am grateful to Dr. Lubit for the kind words about the editorial<sup>1</sup> and for catching my slip. She is absolutely correct that in those two instances the intended word was solute rather than solvent.

**John C. Drummond, M.D., F.R.C.P.C.**, University of California, San Diego, San Diego, California, and Veterans Affairs Medical Center, San Diego, California. [jdrummond@ucsd.edu](mailto:jdrummond@ucsd.edu)

## Reference

1. Drummond JC: Colloid osmotic pressure and the formation of posttraumatic cerebral edema. *ANESTHESIOLOGY* 2010; 112: 1079-80

*(Accepted for publication August 10, 2010.)*
